# Supplementary material
Source: PubMed Central journal article supplement (PMC3860361)

**Supplemental Table 1S.**

Complete list of genes whose expression was significantly regulated in response to high fat lard feeding

| Agilent accession number | Pvalue   | Fold changes | NCBI accession number | Gene symbol       | Genes name                                                                                                              |
|--------------------------|----------|--------------|-----------------------|-------------------|-------------------------------------------------------------------------------------------------------------------------|
| A_51_P453043             | 0.00522  | 3.6          | NM_030210             | <i>Aacs</i>       | acetoacetyl-CoA synthetase                                                                                              |
| A_51_P381683             | 0.00131  | 4.3          | NM_007377             | <i>Aatr</i>       | apoptosis-associated tyrosine kinase                                                                                    |
| A_52_P161305             | 0.000112 | 0.5          | NM_018811             | <i>Abca8b</i>     | ATP-binding cassette, sub-family A (ABC1), member 8b                                                                    |
| A_52_P664506             | 0.0442   | 2.7          | NM_019811             | <i>Abhd2</i>      | aldehyde dehydrogenase domain containing 2                                                                              |
| A_52_P566718             | 0.000623 | 0.4          | NM_019811             | <i>Acas2</i>      | acetyl-Coenzyme A synthetase 2 (ADP forming)                                                                            |
| A_51_P213515             | 0.0297   | 2.6          | NM_145368             | <i>Acnat2</i>     | acyl-coenzyme A amino acid N-acyltransferase 2                                                                          |
| A_52_P72237              | 8.33E-05 | 3.6          | NM_013798             | <i>Actg</i>       | actin, gamma, cytoplasmic                                                                                               |
| A_52_P240164             | 0.00642  | 0.4          | NM_009622             | <i>Adcy1</i>      | adenylate cyclase 1                                                                                                     |
| A_51_P462271             | 0.0309   | 0.4          | NM_007424             | <i>Agc1</i>       | aggreclin 1                                                                                                             |
| A_51_P306731             | 0.0029   | 2.5          | NM_172715             | <i>Agpat9</i>     | 1-acetylgeranyl-3-phosphate O-acyltransferase 9, transcript variant 1                                                   |
| A_51_P391616             | 2.81E-05 | 0.2          | NM_027907             | <i>Agxt2l1</i>    | alanine-glyoxylate aminotransferase 2-like 1                                                                            |
| A_52_P559066             | 0.0183   | 2.7          | XM_131754             | <i>Aim1l</i>      | PREDICTED: Mus musculus absent in melanoma 1-like, transcript variant 1                                                 |
| A_51_P377826             | 0.008    | 2.1          | AF224494              | <i>Airap</i>      | arsenite inducible RNA associated protein                                                                               |
| A_51_P494125             | 0.00235  | 2.1          | NM_007431             | <i>Akp2</i>       | alkaline phosphatase 2                                                                                                  |
| A_52_P129756             | 0.00695  | 4.6          | NM_020559             | <i>Alas1</i>      | aminolevulinic acid synthase 1                                                                                          |
| A_51_P220681             | 5.94E-05 | 0.3          | NM_009657             | <i>Aldoc</i>      | aldolase 3, C isoform                                                                                                   |
| A_51_P243168             | 0.00853  | 2.1          | XM_655201             | <i>Als2cr4</i>    | PREDICTED: Mus musculus amyotrophic lateral sclerosis 2 (juvenile) chromosome region, candidate 4, transcript variant 1 |
| A_51_P293315             | 0.0209   | 2.1          | NM_020033             | <i>Ankd2</i>      | ankyrin repeat domain 2 (stretch responsive muscle)                                                                     |
| A_51_P397783             | 0.00193  | 0.4          | XM_132758             | <i>Anub1l</i>     | Mus musculus AN1, ubiquitin-like, homolog (Xenopus laevis), transcript variant 1                                        |
| A_51_P165342             | 0.00134  | 2.7          | NM_007585             | <i>Anxa2</i>      | annexin A2                                                                                                              |
| A_51_P327496             | 0.000188 | 4.3          | NM_007468             | <i>Apoa4</i>      | apolipoprotein A-IV                                                                                                     |
| A_51_P419319             | 0.00213  | 2.5          | NM_009700             | <i>Aqp4</i>       | aquaporin 4                                                                                                             |
| A_52_P267651             | 3.07E-05 | 0.1          | NM_007489             | <i>Arntl</i>      | aryl hydrocarbon receptor nuclear translocator-like                                                                     |
| A_51_P417651             | 0.00485  | 0.3          | NM_027560             | <i>Arroc2</i>     | arrestin domain containing 2                                                                                            |
| A_52_P164136             | 0.00812  | 3.3          | NM_178917             | <i>Arroc3</i>     | arrestin domain containing 3                                                                                            |
| A_51_P125745             | 0.00505  | 0.1          | NM_012055             | <i>Asns</i>       | asparagine synthetase                                                                                                   |
| A_52_P452689             | 0.000301 | 5            | NM_007498             | <i>Atf3</i>       | activating transcription factor 3                                                                                       |
| A_51_P209736             | 0.00273  | 0.4          | NM_153778             | <i>Atah8</i>      | atoh1 homolog 8 (Drosophila)                                                                                            |
| A_51_P504114             | 0.0116   | 0.5          | NM_015804             | <i>Atp11a</i>     | ATPase, class VI, type 11A                                                                                              |
| A_51_P426792             | 0.00176  | 0.4          | NM_018731             | <i>Atp4a</i>      | ATPase, H <sup>+</sup> /K <sup>+</sup> transporting, alpha polypeptide                                                  |
| A_51_P315042             | 0.00072  | 0.5          | NM_016847             | <i>Avpr1a</i>     | arginine vasopressin receptor 1A                                                                                        |
| A_51_P272553             | 0.00352  | 2.3          | NM_011498             | <i>Bhlhb2</i>     | basic helix-loop-helix domain containing, class B2                                                                      |
| A_51_P393081             | 0.00381  | 3.2          | NM_009812             | <i>Bhlhb3</i>     | basic helix-loop-helix domain containing, class B9                                                                      |
| A_51_P373082             | 5.75E-05 | 0.4          | NM_016778             | <i>Bok</i>        | Bcl-2-related ovarian killer protein                                                                                    |
| A_51_P340601             | 0.000876 | 0.3          | NM_009770             | <i>Btg3</i>       | B-cell translocation gene 3                                                                                             |
| A_51_P221651             | 3.48E-05 | 0.5          | NM_023341             | <i>Cabc1</i>      | chaperone, ABC1 activity of bc1 complex like                                                                            |
| A_51_P382618             | 0.0128   | 0.4          | NM_009810             | <i>Casp3</i>      | caspase 3, apoptosis related cysteine protease                                                                          |
| A_51_P286737             | 0.0359   | 3.4          | NM_011333             | <i>Ccl2</i>       | chemokine (C-C motif) ligand 2                                                                                          |
| A_51_P483512             | 0.0266   | 2.4          | NM_013683             | <i>Ccl5</i>       | chemokine (C-C motif) ligand 5                                                                                          |
| A_51_P262766             | 0.00064  | 3.2          | NM_007631             | <i>Ccni1</i>      | cyclin D1                                                                                                               |
| A_51_P375146             | 0.0251   | 2.3          | NM_007443             | <i>Cd36</i>       | CD36 antigen                                                                                                            |
| A_51_P199135             | 0.0172   | 2.9          | NM_009856             | <i>Cd83</i>       | CD83 antigen                                                                                                            |
| A_51_P320852             | 2.38E-05 | 0.4          | NM_007657             | <i>Cd9</i>        | CD9 antigen                                                                                                             |
| A_51_P137336             | 0.00103  | 0.3          | NM_009864             | <i>Cdh1</i>       | cadherin 1                                                                                                              |
| A_51_P513573             | 7.83E-06 | 0.4          | NM_145603             | <i>Ces2</i>       | carboxylesterase 2                                                                                                      |
| A_51_P443339             | 6.67E-06 | 0.4          | NM_133960             | <i>Ces6</i>       | carboxylesterase 6                                                                                                      |
| A_52_P420045             | 0.00127  | 0.4          | NM_013490             | <i>Chka</i>       | choline kinase alpha                                                                                                    |
| A_51_P390021             | 0.00032  | 2.7          | NM_144803             | <i>Chra2</i>      | cholinergic receptor, nicotinic, alpha polypeptide 2 (neuronal)                                                         |
| A_51_P490456             | 0.0122   | 3.8          | NM_178373             | <i>Cidec</i>      | cell death-inducing DFFA-like effector c                                                                                |
| A_52_P48681              | 0.00356  | 0.4          | NM_016674             | <i>Cldn1</i>      | claudin 1                                                                                                               |
| A_51_P246653             | 0.0321   | 2.7          | NM_020008             | <i>Clec7a</i>     | C-type lectin domain family 7, member a                                                                                 |
| A_51_P304683             | 1.95E-05 | 0.3          | NM_011802             | <i>Clix</i>       | caseinolytic protease X                                                                                                 |
| A_52_P366525             | 3.95E-05 | 3.2          | NM_026424             | <i>Cog10b</i>     | coenzyme Q10 homolog B (S. cerevisiae), transcript variant 2                                                            |
| A_52_P462296             | 0.000642 | 2.3          | NM_007755             | <i>Cpeb1</i>      | cytoplasmic polyadenylation element binding protein 1                                                                   |
| A_52_P13060              | 0.004    | 0.3          | NM_009993             | <i>Cpeb2</i>      | cytoplasmic polyadenylation element binding protein 2                                                                   |
| A_52_P625508             | 0.0145   | 2.8          | NM_009845             | <i>Crt1b</i>      | carotene palmityltransferase 1b, muscle                                                                                 |
| A_51_P122246             | 0.00652  | 2.4          | NM_023220             | <i>Crtl2</i>      | cysteine-rich with EGF-like domains 2                                                                                   |
| A_51_P325776             | 0.000536 | 0.3          | NM_144942             | <i>Csad</i>       | cysteine sulfenic acid decarboxylase                                                                                    |
| A_52_P437662             | 0.021    | 0.2          | NM_013884             | <i>Cspg5</i>      | chondroitin sulfate proteoglycan 5                                                                                      |
| A_51_P251357             | 3.77E-05 | 2.1          | NM_016748             | <i>Ctps</i>       | cytidine 5'-triphosphate synthase                                                                                       |
| A_51_P432641             | 0.00032  | 4            | NM_021274             | <i>Cxcl10</i>     | chemokine (C-X-C motif) ligand 10                                                                                       |
| A_51_P461665             | 0.00296  | 3.4          | NM_008599             | <i>Cxcl9</i>      | chemokine (C-X-C motif) ligand 9                                                                                        |
| A_52_P595871             | 0.0242   | 0.4          | NM_009993             | <i>Cyp1a2</i>     | cytochrome P450, family 1, subfamily a, polypeptide 2                                                                   |
| A_52_P382149             | 0.00345  | 0.2          | NM_007811             | <i>Cyp26a1</i>    | cytochrome P450, family 26, subfamily a, polypeptide 1                                                                  |
| A_52_P472486             | 0.0124   | 0.2          | NM_009999             | <i>Cyp2b10</i>    | cytochrome P450, family 2, subfamily b, polypeptide 10                                                                  |
| A_51_P492339             | 0.00839  | 5            | NM_007813             | <i>Cyp2b13</i>    | cytochrome P450, family 2, subfamily b, polypeptide 13                                                                  |
| A_52_P289091             | 0.000175 | 17.8         | NM_007813             | <i>Cyp2b13</i>    | cytochrome P450, family 2, subfamily b, polypeptide 13                                                                  |
| A_51_P467076             | 0.000686 | 8.6          | NM_010000             | <i>Cyp2b9</i>     | cytochrome P450, family 2, subfamily b, polypeptide 9                                                                   |
| A_51_P447785             | 3.42E-05 | 0.1          | NM_028089             | <i>Cyp2c55</i>    | cytochrome P450, family 2, subfamily c, polypeptide 55                                                                  |
| A_51_P134142             | 1.95E-05 | 0.4          | NM_145499             | <i>Cyp2c70</i>    | cytochrome P450, family 2, subfamily c, polypeptide 70                                                                  |
| A_51_P335301             | 1.81E-05 | 0.2          | NM_007818             | <i>Cyp3a11</i>    | cytochrome P450, family 3, subfamily a, polypeptide 11                                                                  |
| A_51_P482051             | 8.75E-06 | 0.1          | NM_007820             | <i>Cyp3a16</i>    | cytochrome P450, family 3, subfamily a, polypeptide 16                                                                  |
| A_51_P341203             | 7.83E-06 | 0.2          | NM_017396             | <i>Cyp3a41</i>    | cytochrome P450, family 3, subfamily a, polypeptide 41                                                                  |
| A_52_P571006             | 1.95E-05 | 0.2          | NM_177380             | <i>Cyp3a44</i>    | cytochrome P450, family 3, subfamily a, polypeptide 44                                                                  |
| A_52_P257774             | 0.0126   | 2.4          | NM_010011             | <i>Cyp4a10</i>    | cytochrome P450, family 4, subfamily a, polypeptide 10                                                                  |
| A_52_P164161             | 0.002029 | 0.3          | NM_020010             | <i>Cyp51</i>      | cytochrome P450, family 51                                                                                              |
| A_52_P84027              | 0.00268  | 9.6          | NM_007824             | <i>Cyp7a1</i>     | cytochrome P450, family 7, subfamily a, polypeptide 1                                                                   |
| A_51_P377557             | 0.00023  | 2.3          | NM_029794             | <i>D11Ert636e</i> | DNA segment, Chr 11, ERA10 Dot 636, expressed                                                                           |
| A_52_P223809             | 0.000345 | 2.5          | NM_030169             | <i>D11Erp2e</i>   | DNA segment, Chr 11, Lotar Hemmehausen 2, expressed                                                                     |
| A_52_P630563             | 0.00319  | 0.5          | NM_027852             | <i>D5Wsu178e</i>  | DNA segment, Chr 5, Wayne State University 178, expressed (D5Wsu178e)                                                   |
| A_51_P180492             | 0.000344 | 12.4         | NM_016974             | <i>Dbp</i>        | D site albumin promoter binding protein                                                                                 |
| A_52_P327627             | 5.24E-05 | 2.6          | NM_018831             | <i>Dclre1a</i>    | DNA cross-link repair 1A, PSO2 homolog                                                                                  |
| A_51_P116838             | 0.00138  | 0.3          | NM_010024             | <i>Dct</i>        | dopachrome tautomerase                                                                                                  |
| A_52_P63905              | 2.52E-05 | 0.5          | NM_016672             | <i>Ddc</i>        | dopa decarboxylase                                                                                                      |
| A_52_P536731             | 0.00409  | 0.2          | NM_001004364          | <i>Ddef2</i>      | development and differentiation enhancing factor 2                                                                      |
| A_51_P245796             | 0.00572  | 0.2          | NM_029083             | <i>Ddit4</i>      | DNA-damage-inducible transcript 4                                                                                       |
| A_52_P535946             | 0.00401  | 0.3          | NM_007896             | <i>Dhcr7</i>      | 7-dehydrocholesterol reductase                                                                                          |
| A_51_P403477             | 0.0136   | 2            | NM_007860             | <i>Diol1</i>      | diolase, iodothyronine, type 1                                                                                          |
| A_52_P310225             | 0.000629 | 2            | NM_008298             | <i>Dnaa1</i>      | DnaJ (Hsp40) homolog, subfamily A, member 1                                                                             |
| A_52_P369415             | 0.0329   | 2.4          | NM_207649             | <i>Dscr11l</i>    | Down syndrome critical region gene 1-like 1                                                                             |
| A_51_P495212             | 0.00018  | 0.4          | NM_172442             | <i>Dtx4</i>       | deltex 4 homolog (Drosophila)                                                                                           |
| A_51_P502614             | 0.00678  | 2            | NM_026268             | <i>Dusp6</i>      | dual specificity phosphatase 6                                                                                          |
| A_51_P455338             | 0.0309   | 2.4          | NM_053113             | <i>Ear1l</i>      | eosinophil-associated, ribonuclease A family, member 11                                                                 |
| A_51_P187842             | 0.0175   | 2.5          | NM_028229             | <i>Eif4e3</i>     | eukaryotic translation initiation factor 4E member 3                                                                    |
| A_51_P324633             | 1.61E-05 | 0.1          | NM_007703             | <i>Elovl3</i>     | elongation of very long chain fatty acids 3                                                                             |
| A_51_P401974             | 6.83E-05 | 2            | NM_015744             | <i>Engp2</i>      | ectonucleotide pyrophosphatase/phosphodiesterase 2                                                                      |
| A_52_P257426             | 9.14E-05 | 0.5          | NM_133191             | <i>Eps8l2</i>     | EPS8-like 2                                                                                                             |
| A_52_P317246             | 0.000696 | 3.3          | NM_011935             | <i>Esrrg</i>      | estrogen-related receptor gamma                                                                                         |
| A_51_P117618             | 0.00563  | 0.2          | NM_023154             | <i>Ethel1</i>     | ethylmalonic encephalopathy 1                                                                                           |
| A_51_P346893             | 0.00925  | 3.5          | NM_019578             | <i>Extl1</i>      | exostosins (multiple)-like 1                                                                                            |
| A_51_P313381             | 0.000116 | 2.6          | NM_007890             | <i>Fabp2</i>      | fatty acid binding protein 2, intestinal                                                                                |
| A_51_P30074              | 0.0257   | 2.8          | NM_021272             | <i>Fabp7</i>      | fatty acid binding protein 7, brain                                                                                     |
| A_52_P181733             | 5.41E-06 | 4            | NM_153600             | <i>Fam102a</i>    | Mus musculus family with sequence similarity 102, member A                                                              |
| A_52_P21986              | 9.88E-05 | 0.5          | NM_026062             | <i>Fam69a</i>     | family with sequence similarity 69, member A                                                                            |
| A_51_P379798             | 3.73E-05 | 0.2          | NM_134469             | <i>Fdps</i>       | farnesyl diphosphate synthetase                                                                                         |
| A_51_P148828             | 0.000125 | 2.4          | NM_010197             | <i>Fgf1</i>       | fibroblast growth factor 1                                                                                              |
| A_52_P235347             | 0.00496  | 6.5          | NM_020013             | <i>Fgf21</i>      | fibroblast growth factor 21                                                                                             |
| A_51_P361220             | 0.000188 | 2            | NM_008055             | <i>Fzd4</i>       | frizzled homolog 4 (Drosophila)                                                                                         |
| A_52_P681391             | 0.00104  | 4.1          | NM_008059             | <i>G0S2</i>       | GO/G1 switch gene 2                                                                                                     |
| A_51_P296608             | 0.0316   | 3.7          | NM_007836             | <i>Gadd45a</i>    | growth arrest and DNA-damage-inducible 45 alpha                                                                         |
| A_51_P355629             | 0.00139  | 0.5          | NM_008087             | <i>Gas2</i>       | growth arrest specific 2                                                                                                |
| A_51_P203955             | 0.00931  | 2.9          | NM_010260             | <i>Gbp2</i>       | guanylate nucleotide binding protein 2                                                                                  |
| A_51_P165244             | 0.00131  | 3.6          | NM_018734             | <i>Gbp4</i>       | guanylate nucleotide binding protein 4                                                                                  |
| A_51_P463846             | 0.000601 | 3.4          | NM_145645             | <i>Gbp6</i>       | guanylate binding protein 6                                                                                             |
| A_52_P287456             | 0.0155   | 0.4          | NM_145623             | <i>Gca</i>        | granulocin                                                                                                              |
| A_52_P259537             | 0.00278  | 2.8          | NM_010292             | <i>Gck</i>        | glucokinase                                                                                                             |
| A_52_P532982             | 0.00846  | 0.4          | NM_011819             | <i>Gdf15</i>      | growth differentiation factor 15                                                                                        |
| A_51_P311546             | 4.98E-05 | 3.4          | NM_138595             | <i>Glic</i>       | glycine decarboxylase                                                                                                   |

|              |          |      |             |                 |                                                                                                                         |
|--------------|----------|------|-------------|-----------------|-------------------------------------------------------------------------------------------------------------------------|
| A_51_P110323 | 0.000798 | 5    | NM_008137   | <i>Gna14</i>    | guanine nucleotide binding protein, alpha 14                                                                            |
| A_51_P383774 | 0.0334   | 0.4  | NM_010314   | <i>Gngt1</i>    | guanine nucleotide binding protein (G protein), gamma transducing activity polypeptide 1                                |
| A_51_P370700 | 0.016    | 0.4  | NM_010324   | <i>Got1</i>     | glutamate oxaloacetate transaminase 1, soluble                                                                          |
| A_51_P276943 | 8.75E-06 | 5.1  | NM_016985   | <i>Gpc1</i>     | glypican 1                                                                                                              |
| A_52_P566840 | 0.00311  | 0.1  | NM_133778   | <i>Gpr110</i>   | G protein-coupled receptor 110                                                                                          |
| A_52_P141488 | 0.000197 | 0.3  | NM_018869   | <i>Gprk5</i>    | G protein-coupled receptor kinase 5                                                                                     |
| A_51_P397934 | 9.82E-06 | 9.4  | NM_130455   | <i>Grin3b</i>   | glutamate receptor, ionotropic, NMDA3B                                                                                  |
| A_51_P305140 | 0.00629  | 0.4  | NM_008181   | <i>Gsta1</i>    | glutathione S-transferase, alpha 1                                                                                      |
| A_52_P458682 | 9.14E-05 | 0.2  | NM_008182   | <i>Gsta2</i>    | glutathione S-transferase, alpha 2                                                                                      |
| A_51_P112223 | 2.81E-05 | 0.5  | NM_010357   | <i>Gsta4</i>    | glutathione S-transferase, alpha 4                                                                                      |
| A_52_P415215 | 8.74E-05 | 0.5  | NM_010358   | <i>Gstm1</i>    | glutathione S-transferase, mu 1                                                                                         |
| A_51_P454949 | 8.75E-06 | 0.5  | NM_010359   | <i>Gstm3</i>    | glutathione S-transferase, mu 3                                                                                         |
| A_52_P415996 | 0.000135 | 0.4  | NM_008184   | <i>Gstm6</i>    | glutathione S-transferase, mu 6                                                                                         |
| A_51_P374464 | 2.95E-05 | 0.4  | NM_013541   | <i>Gstp1</i>    | glutathione S-transferase, pi 1                                                                                         |
| A_52_P391505 | 0.000143 | 0.1  | NM_144513   | <i>GT2</i>      | GT2, imprinted maternally expressed untranslated mRNA                                                                   |
| A_51_P199993 | 0.000812 | 0.5  | NM_021896   | <i>Gucy1a3</i>  | guanylate cyclase 1, soluble, alpha 3                                                                                   |
| A_51_P134228 | 3.77E-05 | 2    | NM_172563   | <i>Hlf</i>      | hepatic leukemia factor                                                                                                 |
| A_52_P32287  | 3.41E-05 | 0.4  | NM_008255   | <i>Hmgcr</i>    | 3-hydroxy-3-methylglutaryl-Coenzyme A reductase                                                                         |
| A_51_P146941 | 5.95E-05 | 0.4  | NM_035342   | <i>Hmgcs1</i>   | 3-hydroxy-3-methylglutaryl-Coenzyme A synthase 1                                                                        |
| A_51_P352303 | 0.000114 | 0.1  | NM_011983   | <i>Homer2</i>   | homer homolog 2 (Drosophila)                                                                                            |
| A_52_P441634 | 0.000269 | 0.3  | NM_177960   | <i>Idi1</i>     | isopentenyl-diphosphate delta isomerase                                                                                 |
| A_51_P391432 | 7.41E-05 | 2.2  | NM_145449   | <i>Ifi2712b</i> | interferon, alpha-inducible protein 27 like 2B                                                                          |
| A_51_P327751 | 0.00173  | 5    | NM_008331   | <i>Ifit1</i>    | interferon-induced protein with tetratricopeptide repeats 1                                                             |
| A_51_P359570 | 0.000394 | 3.6  | NM_010501   | <i>Ifit3</i>    | interferon-induced protein with tetratricopeptide repeats 3                                                             |
| A_51_P112355 | 0.000119 | 3.1  | NM_018738   | <i>Igtp</i>     | interferon gamma induced GTPase                                                                                         |
| A_51_P357735 | 0.000466 | 3.8  | NM_008382   | <i>Inhbe</i>    | inhibin beta E                                                                                                          |
| A_52_P393392 | 0.000503 | 0.4  | NM_153526   | <i>Insp1</i>    | insulin induced gene 1                                                                                                  |
| A_52_P113250 | 0.00107  | 0.5  | NM_178082   | <i>Insg2</i>    | insulin induced gene 2                                                                                                  |
| A_51_P257058 | 0.000435 | 0.4  | NM_029634   | <i>Ip6k2</i>    | inositol hexaphosphate kinase 2                                                                                         |
| A_52_P463936 | 0.0016   | 2.6  | NM_015783   | <i>Isg15</i>    | ISG15 ubiquitin-like modifier                                                                                           |
| A_51_P364250 | 0.000969 | 0.5  | NM_172471   | <i>Ith5</i>     | inter-alpha (globulin) inhibitor H5                                                                                     |
| A_51_P325914 | 7.72E-05 | 3.5  | NM_010591   | <i>Jun</i>      | Jun oncogene                                                                                                            |
| A_52_P570240 | 0.00577  | 2.1  | NM_080303   | <i>Kbtbd11</i>  | transcript variant 1                                                                                                    |
| A_51_P287198 | 0.0067   | 2.5  | NM_033373   | <i>Krt1-23</i>  | keratin complex 1, acidic, gene 23                                                                                      |
| A_51_P303556 | 0.00565  | 2.8  | NM_008484   | <i>Lamb3</i>    | lammin, beta 3                                                                                                          |
| A_52_P257812 | 0.00702  | 1.3  | NM_008590   | <i>Lpl</i>      | lipoprotein lipase                                                                                                      |
| A_51_P267354 | 0.0123   | 0.4  | NM_175478   | <i>Lrn3</i>     | leucine rich repeat and fibronectin type III domain containing 3                                                        |
| A_51_P437426 | 0.00274  | 2.1  | NM_146069   | <i>Lrrc33</i>   | leucine rich repeat containing 33                                                                                       |
| A_51_P326685 | 0.0167   | 2.2  | NM_176920   | <i>Lrtm1</i>    | leucine-rich repeats and transmembrane domains 1                                                                        |
| A_51_P302358 | 0.000387 | 2.2  | NM_008518   | <i>Ltb</i>      | lymphotoxin B                                                                                                           |
| A_51_P343517 | 0.000876 | 3.4  | NM_010742   | <i>Ly6d</i>     | lymphocyte antigen 6 complex, locus D                                                                                   |
| A_51_P179987 | 2.81E-05 | 0.5  | NM_027985   | <i>Mad2l2</i>   | MAD2 mitotic arrest deficient-like 2                                                                                    |
| A_52_P547187 | 2.81E-05 | 0.4  | NM_134645   | <i>Map3k2d2</i> | MAP3K2 domain protein kinase kinase kinase 7 interacting protein 2                                                      |
| A_52_P541175 | 2.81E-05 | 2.3  | NM_183195   | <i>Marveld1</i> | MARVEL (membrane-associated) domain containing 1                                                                        |
| A_51_P389539 | 8.33E-05 | 10.2 | NM_054053   | <i>Mass1</i>    | monogenic, audiogenic seizure susceptibility 1                                                                          |
| A_51_P196113 | 0.0108   | 0.4  | NM_019945   | <i>Mast1</i>    | microtubule associated serine/threonine kinase 1                                                                        |
| A_51_P186601 | 0.00144  | 0.5  | M29546      | <i>Me1</i>      | Mouse MOD-1 null malic enzyme                                                                                           |
| A_51_P480390 | 0.00605  | 0.4  | NM_008579   | <i>Meig1</i>    | meiosis expressed gene 1                                                                                                |
| A_52_P423810 | 0.0152   | 0.3  | BC027282    | <i>Mt1</i>      | metallothionein 1 mRNA (cDNA clone MGC:27821 IMAGE:3483861), complete cds.                                              |
| A_51_P139920 | 0.00611  | 2.3  | NM_011844   | <i>Mpl</i>      | monocyte colony stimulating factor receptor                                                                             |
| A_52_P364021 | 0.00172  | 4.9  | NM_028713   | <i>Mgat1</i>    | monoglycosylidyl O-acyltransferase 1                                                                                    |
| A_52_P189772 | 0.00554  | 3.1  | NM_194336   | <i>Mpa2l</i>    | macrophage activation 2 like                                                                                            |
| A_51_P228295 | 0.000306 | 0.3  | NM_01001880 | <i>Mpz1</i>     | myelin protein zero-like 1                                                                                              |
| A_52_P525183 | 0.00217  | 2.7  | NM_134188   | <i>Mte1</i>     | mitochondrial acyl-CoA thioesterase 1                                                                                   |
| A_51_P202623 | 0.00505  | 2.6  | NM_028832   | <i>Mterfd3</i>  | MTERF domain containing 3                                                                                               |
| A_52_P167278 | 0.00375  | 3.1  | NM_172308   | <i>Mthfd1l</i>  | methylene tetrahydrofolate dehydrogenase (NADP+ dependent)-like                                                         |
| A_52_P413947 | 0.0184   | 0.4  | NM_010840   | <i>Mthfr</i>    | 5,10-methylenetetrahydrofolate reductase                                                                                |
| A_51_P405606 | 8.33E-05 | 0.2  | NM_010884   | <i>Ndr1</i>     | N-myc downstream regulated gene 1                                                                                       |
| A_51_P501018 | 0.0129   | 0.4  | NM_010892   | <i>Nek2</i>     | NIMA (never in mitosis gene a)-related expressed kinase 2                                                               |
| A_52_P20727  | 2.52E-05 | 2.1  | NM_175340   | <i>Nhlrc1</i>   | NHL repeat containing 1                                                                                                 |
| A_51_P315666 | 3.42E-05 | 0.3  | NM_008695   | <i>Nid2</i>     | nidogen 2                                                                                                               |
| A_51_P300666 | 0.0279   | 0.5  | NM_153288   | <i>Npb</i>      | neuropeptide B                                                                                                          |
| A_51_P159803 | 0.00245  | 2.4  | NM_032002   | <i>Nrg4</i>     | neuregulin 4                                                                                                            |
| A_51_P469285 | 0.0329   | 2.1  | NM_008737   | <i>Nrp1</i>     | neuropilin 1                                                                                                            |
| A_51_P326942 | 0.000179 | 0.2  | NM_010947   | <i>Nsdhl</i>    | NAD(P) dependent steroid dehydrogenase-like                                                                             |
| A_51_P193336 | 0.0443   | 0.3  | NM_016773   | <i>Nucb2</i>    | nucleobandin 2                                                                                                          |
| A_51_P437309 | 0.00512  | 2.3  | NM_145209   | <i>Oasl1</i>    | 2'-5' oligoadenylate synthetase-like 1                                                                                  |
| A_52_P436238 | 0.000615 | 2.1  | NM_013614   | <i>Odc1</i>     | ornithine decarboxylase, structural 1                                                                                   |
| A_51_P434928 | 0.000209 | 0.5  | NM_146287   | <i>Olfrr114</i> | olfactory receptor 114                                                                                                  |
| A_51_P368894 | 0.034    | 2.4  | NM_008262   | <i>Onecut1</i>  | one cut domain, family member 1                                                                                         |
| A_51_P196844 | 2.93E-05 | 8.4  | NM_027881   | <i>Osbpl3</i>   | oxysterol binding protein-like 3                                                                                        |
| A_52_P134075 | 4.72E-05 | 4    | NM_024289   | <i>Osbpl5</i>   | oxysterol binding protein-like 5                                                                                        |
| A_52_P40934  | 0.000518 | 2.1  | NM_198414   | <i>Pact1</i>    | proteoglycan and adipon receptor family member IX                                                                       |
| A_51_P387235 | 1.95E-05 | 3    | NM_021524   | <i>Pber1</i>    | pre-B-cell colony-enhancing factor 1                                                                                    |
| A_51_P124388 | 0.00897  | 0.4  | NM_145977   | <i>Pcanap6</i>  | prostate cancer associated protein 6                                                                                    |
| A_51_P205286 | 1.21E-05 | 4.7  | NM_008793   | <i>Pcsk4</i>    | proprotein convertase subtilisin/kexin type 4                                                                           |
| A_51_P397673 | 0.000269 | 0.2  | NM_153565   | <i>Pcsk9</i>    | proprotein convertase subtilisin/kexin type 9                                                                           |
| A_51_P333839 | 8.17E-06 | 0.4  | NM_019971   | <i>Pdgfr</i>    | platelet-derived growth factor, C polypeptide                                                                           |
| A_52_P445958 | 0.0149   | 2.1  | NM_172134   | <i>Pdk</i>      | pyridoxal (pyridoxine, vitamin B6) kinase                                                                               |
| A_51_P282760 | 2.81E-05 | 11.6 | NM_011068   | <i>Per2</i>     | period homolog 2 (Drosophila)                                                                                           |
| A_52_P34306  | 0.000182 | 2.1  | NM_028730   | <i>Pex26</i>    | peroxisome biogenesis factor 26                                                                                         |
| A_52_P99848  | 0.0202   | 2    | NM_008840   | <i>Pik3cd</i>   | phosphatidylinositol 3-kinase catalytic delta polypeptide, transcript variant 1                                         |
| A_51_P511236 | 0.000227 | 2.7  | NM_011085   | <i>Pik3r1</i>   | phosphatidylinositol 3-kinase, regulatory subunit, polypeptide 1                                                        |
| A_51_P226655 | 0.0245   | 0.4  | NM_011125   | <i>Pltp</i>     | phospholipid transfer protein                                                                                           |
| A_51_P492410 | 0.000159 | 0.4  | NM_026784   | <i>Pmvk</i>     | phosphomevalonate kinase                                                                                                |
| A_52_P30451  | 0.0247   | 0.5  | NM_016854   | <i>Ppp1r3c</i>  | protein phosphatase 1, regulatory (inhibitor) subunit 3C                                                                |
| A_51_P486217 | 0.0271   | 0.4  | NM_176538   | <i>Ppkwnk4</i>  | protein kinase, lysine deficient 4                                                                                      |
| A_51_P369310 | 0.00104  | 2.3  | NM_172892   | <i>Prl3a2</i>   | proteasome (prosome, macroprosome) subunit, beta type 9                                                                 |
| A_51_P420489 | 0.00375  | 11.6 | NM_134246   | <i>Pte2a</i>    | peroxisomal acyl-CoA thioesterase 2A                                                                                    |
| A_52_P215170 | 0.000572 | 3.2  | NM_134247   | <i>Pte2b</i>    | peroxisomal acyl-CoA thioesterase 2B                                                                                    |
| A_51_P157406 | 0.0018   | 0.2  | NM_008963   | <i>Ptgds</i>    | prostaglandin D2 synthase (brain)                                                                                       |
| A_52_P587378 | 0.00316  | 2.1  | NM_011200   | <i>Ptp4a1</i>   | protein tyrosine phosphatase 4a1                                                                                        |
| A_51_P269792 | 0.00088  | 5.6  | NM_090914   | <i>Rad51ll1</i> | RAD51-like 1                                                                                                            |
| A_52_P256771 | 0.00059  | 0.3  | NM_090916   | <i>Raet1a</i>   | retinoic acid early transcript 1, alpha                                                                                 |
| A_52_P10063  | 0.000177 | 0.2  | NM_198193   | <i>Raet1e</i>   | retinoic acid early transcript 1E                                                                                       |
| A_51_P469160 | 0.000168 | 0.3  | NM_021557   | <i>Rd11</i>     | retinol dehydrogenase 11                                                                                                |
| A_51_P177762 | 0.00164  | 2.1  | NM_153133   | <i>Rdh9</i>     | retinol dehydrogenase 9                                                                                                 |
| A_52_P261868 | 0.0412   | 2.5  | NM_134257   | <i>Rgs3</i>     | regulator of G-protein signaling 3 (Rgs3), transcript variant 2                                                         |
| A_51_P294288 | 0.000307 | 2.2  | NM_146002   | <i>Rhbd17</i>   | rhuboid, veinlet-like 7 (Drosophila)                                                                                    |
| A_51_P386539 | 0.00591  | 0.4  | NM_026301   | <i>Rnf125</i>   | ring finger protein 125                                                                                                 |
| A_51_P247637 | 0.000835 | 0.3  | NM_080563   | <i>Rnf144</i>   | ring finger protein 144                                                                                                 |
| A_51_P272023 | 0.00461  | 2.5  | NM_025786   | <i>Rnf186</i>   | ring finger protein 186                                                                                                 |
| A_52_P670026 | 0.00232  | 2.8  | NM_011068   | <i>Rpl3a2</i>   | ribosomal protein L3 (sodium/sulfate symporters), member 4                                                              |
| A_52_P379337 | 0.000211 | 2.1  | NM_194054   | <i>Rtn4</i>     | reticulon 4                                                                                                             |
| A_52_P94401  | 0.00563  | 0.5  | NM_177708   | <i>Rtn4r1</i>   | reticulon 4 receptor-like 1                                                                                             |
| A_51_P209372 | 0.00972  | 0.5  | NM_025436   | <i>Sc4mol</i>   | sterol-C4-methyl oxidase-like                                                                                           |
| A_52_P682382 | 0.0158   | 0.3  | NM_099127   | <i>Scd1</i>     | stearoyl-Coenzyme A desaturase 1                                                                                        |
| A_51_P249335 | 0.00709  | 0.4  | NM_145565   | <i>Sds</i>      | serine dehydratase                                                                                                      |
| A_51_P431018 | 0.000558 | 0.4  | NM_019444   | <i>Selenbp2</i> | selenium binding protein 2                                                                                              |
| A_51_P383310 | 0.00521  | 3.7  | NM_035550   | <i>Sema5b</i>   | semaphorin, seven thrombospondin repeats (type 1 and type 1-like), transmembrane domain (TM) and short cytoplasmic tail |
| A_51_P050505 | 0.000503 | 0.2  | NM_172892   | <i>Slc13a1</i>  | solute carrier family 13 (sodium/sulfate symporters), member 4                                                          |
| A_51_P221031 | 1.95E-05 | 2.7  | NM_172838   | <i>Slc16a12</i> | solute carrier family 16 (monocarboxylic acid transporters), member 12                                                  |
| A_51_P466633 | 0.000233 | 2.1  | NM_011391   | <i>Slc16a7</i>  | solute carrier family 16 (monocarboxylic acid transporters), member 7                                                   |
| A_52_P163021 | 9.82E-06 | 3.8  | NM_182959   | <i>Slc17a8</i>  | solute carrier family 17 (sodium-dependent inorganic phosphate cotransporter), member 8                                 |
| A_51_P173445 | 6.83E-05 | 0.3  | NM_136506   | <i>Slc30a10</i> | PREDICTED: similar to solute carrier family 30 (zinc transporter), member 10 isoform a                                  |
| A_51_P103222 | 8.62E-06 | 0.3  | NM_028064   | <i>Slc39a4</i>  | solute carrier family 39 (zinc transporter), member 4                                                                   |
| A_51_P442097 | 0.00528  | 2.6  | NM_027868   | <i>Slc41a3</i>  | solute carrier family 41, member 3                                                                                      |
| A_52_P55661  | 3.49E-05 | 2.5  | NM_177870   | <i>Slc5a6</i>   | solute carrier family 5 (sodium-dependent vitamin transporter), member 6                                                |
| A_51_P315931 | 2.93E-05 | 0.4  | NM_033314   | <i>Slc22a7</i>  | solute carrier organic anion transporter family, member 2a1                                                             |
| A_51_P487298 | 0.00177  | 0.4  | NM_139307   | <i>Slit2</i>    | Slit-like 2 (Drosophila)                                                                                                |
| A_52_P478025 | 0.00756  | 3.4  | NM_021491   | <i>Smpd3</i>    | sphingomyelin phosphodiesterase 3, neutral                                                                              |
| A_51_P214209 | 0.000203 | 2.3  | NM_026282   | <i>Spbc24</i>   | spindle pole body component 24 homolog                                                                                  |
| A_52_P381484 | 0.00104  | 0.2  | NM_133903   | <i>Spon2</i>    | spondin 2, extracellular matrix protein                                                                                 |
| A_51_P139678 | 0.0101   | 2.1  | NM_092624   | <i>Spr1a</i>    | small proline-rich protein 1A                                                                                           |

|              |          |     |              |                 |                                                                                                                                                                           |  |  |  |
|--------------|----------|-----|--------------|-----------------|---------------------------------------------------------------------------------------------------------------------------------------------------------------------------|--|--|--|
| A_51_P450487 | 0.000138 | 0.2 | NM_009270    | <i>Sqle</i>     | squalene epoxidase                                                                                                                                                        |  |  |  |
| A_52_P562612 | 0.000118 | 0.4 | NM_175283    | <i>Srd5a1</i>   | steroid 5 alpha-reductase 1                                                                                                                                               |  |  |  |
| A_51_P469951 | 3.53E-05 | 0.2 | NM_153070    | <i>Srgap3</i>   | SLIT-ROBO Rho GTPase activating protein 3                                                                                                                                 |  |  |  |
| A_51_P300709 | 0.000132 | 2   | NM_009272    | <i>Srm</i>      | spermidine synthase                                                                                                                                                       |  |  |  |
| A_51_P352594 | 0.00198  | 0.5 | NM_001001326 | <i>St5</i>      | suppression of tumorigenicity 5                                                                                                                                           |  |  |  |
| A_51_P431047 | 0.00415  | 3.7 | NM_009182    | <i>St8sia3</i>  | ST8 alpha-N-acetylneuraminidase alpha-2,8-sialyltransferase 3                                                                                                             |  |  |  |
| A_52_P70255  | 0.000646 | 2.2 | NM_009283    | <i>Stat1</i>    | signal transducer and activator of transcription 1                                                                                                                        |  |  |  |
| A_51_P228574 | 0.0161   | 0.5 | NM_146214    | <i>Tat</i>      | tyrosine aminotransferase                                                                                                                                                 |  |  |  |
| A_52_P159276 | 0.00101  | 2.3 | NM_145890    | <i>Tcfcp2l2</i> | transcription factor CP2-like 2                                                                                                                                           |  |  |  |
| A_51_P450561 | 0.000236 | 2.8 | NM_153484    | <i>Tef</i>      | thyrotroph embryonic factor                                                                                                                                               |  |  |  |
| A_51_P456208 | 0.0347   | 0.4 | NM_011575    | <i>Tff3</i>     | trefoil factor 3, intestinal                                                                                                                                              |  |  |  |
| A_51_P341918 | 0.0329   | 2.6 | NM_009366    | <i>Tgfb14</i>   | transforming growth factor beta 1 induced transcript 4, transcript variant 2                                                                                              |  |  |  |
| A_52_P627816 | 0.0042   | 2   | NM_019984    | <i>Tgm1</i>     | transglutaminase 1, K polypeptide                                                                                                                                         |  |  |  |
| A_52_P676510 | 0.00209  | 3   | NM_011579    | <i>Tgtp</i>     | T-cell specific GTPase                                                                                                                                                    |  |  |  |
| A_51_P226453 | 8.74E-05 | 3.3 | NM_025590    | <i>Thea</i>     | thioesterase, adipose associated                                                                                                                                          |  |  |  |
| A_51_P194099 | 8.87E-05 | 5   | NM_009381    | <i>Thrsp</i>    | thyroid hormone responsive SPOT14 homolog (Rattus)                                                                                                                        |  |  |  |
| A_51_P452629 | 0.00837  | 2.1 | NM_011905    | <i>Tlr2</i>     | toll-like receptor 2                                                                                                                                                      |  |  |  |
| A_51_P461123 | 0.000166 | 2.7 | AF186107     | <i>Tlr5</i>     | toll-like receptor 5                                                                                                                                                      |  |  |  |
| A_52_P35064  | 5.16E-05 | 0.4 | NM_028454    | <i>Tm7sf2</i>   | transmembrane 7 superfamily member 2                                                                                                                                      |  |  |  |
| A_52_P281543 | 0.0385   | 0.4 | NM_175507    | <i>Tmem20</i>   | transmembrane protein 20                                                                                                                                                  |  |  |  |
| A_51_P331207 | 0.00156  | 0.4 | NM_025464    | <i>Tmem218</i>  | transmembrane protein 218                                                                                                                                                 |  |  |  |
| A_51_P125842 | 0.000177 | 0.5 | NM_145402    | <i>Tmem51</i>   | transmembrane protein 51                                                                                                                                                  |  |  |  |
| A_52_P418477 | 0.0018   | 3.1 | NM_009416    | <i>Tpm2</i>     | tropomyosin 2, beta                                                                                                                                                       |  |  |  |
| A_52_P600274 | 0.0359   | 0.5 | NM_175093    | <i>Trib3</i>    | tribbles homolog 3, transcript variant 2                                                                                                                                  |  |  |  |
| A_52_P303100 | 0.0232   | 2.5 | NM_175130    | <i>Trpm4</i>    | transient receptor potential cation channel, subfamily M, member 4                                                                                                        |  |  |  |
| A_52_P65829  | 0.0193   | 2   | NM_01124819  | <i>Tsku</i>     | tsukushin                                                                                                                                                                 |  |  |  |
| A_52_P303161 | 0.0013   | 0.2 | NM_01124819  | <i>Tuba8</i>    | tubulin, alpha 8                                                                                                                                                          |  |  |  |
| A_51_P103659 | 0.000449 | 0.2 | NM_009450    | <i>Tubb2</i>    | tubulin, beta 2                                                                                                                                                           |  |  |  |
| A_51_P315795 | 0.000144 | 0.5 | NM_009451    | <i>Tubb4</i>    | tubulin, beta 4                                                                                                                                                           |  |  |  |
| A_52_P163795 | 1.95E-05 | 0.5 | NM_011655    | <i>Tubb5</i>    | tubulin, beta 5                                                                                                                                                           |  |  |  |
| A_52_P186937 | 0.0161   | 2   | NM_020557    | <i>Tyki</i>     | thymidylate kinase family LPS-inducible member                                                                                                                            |  |  |  |
| A_52_P338066 | 4.97E-05 | 4.9 | NM_023137    | <i>Ubd</i>      | ubiquitin D                                                                                                                                                               |  |  |  |
| A_52_P198239 | 0.00437  | 0.4 | XM_355202    | <i>Ube2u</i>    | transcript variant 1                                                                                                                                                      |  |  |  |
| A_52_P156806 | 0.000646 | 0.2 | NM_201644    | <i>Ugt1a9</i>   | UDP glucuronosyltransferase 1 family, polypeptide A9                                                                                                                      |  |  |  |
| A_51_P245503 | 0.000491 | 0.5 | NM_152811    | <i>Ugt2b1</i>   | UDP glucuronosyltransferase 2 family, polypeptide B1                                                                                                                      |  |  |  |
| A_51_P294535 | 0.00011  | 3.2 | NM_029770    | <i>Unc5b</i>    | unc-5 homolog B                                                                                                                                                           |  |  |  |
| A_52_P259817 | 0.0455   | 2.6 | NM_029692    | <i>Upp2</i>     | uridine phosphorylase 2                                                                                                                                                   |  |  |  |
| A_51_P164219 | 0.000655 | 3.3 | NM_011909    | <i>Usp18</i>    | ubiquitin specific protease 18                                                                                                                                            |  |  |  |
| A_51_P172663 | 0.00172  | 6.4 | NM_016808    | <i>Usp2</i>     | ubiquitin specific protease 2                                                                                                                                             |  |  |  |
| A_52_P436628 | 0.000121 | 0.5 | NM_011697    | <i>Vegfb</i>    | vascular endothelial growth factor B                                                                                                                                      |  |  |  |
| A_51_P278334 | 0.0035   | 2.5 | NM_013703    | <i>Vldlr</i>    | very low density lipoprotein receptor                                                                                                                                     |  |  |  |
| A_51_P424332 | 0.000536 | 3   | NM_011704    | <i>Vnn1</i>     | vanin 1                                                                                                                                                                   |  |  |  |
| A_51_P400217 | 0.000536 | 0.4 | NM_016982    | <i>Vpreb1</i>   | pre-B lymphocyte gene 1                                                                                                                                                   |  |  |  |
| A_51_P465211 | 0.00115  | 3.1 | NM_026323    | <i>Wfdc2</i>    | WAP four-disulfide core domain 2                                                                                                                                          |  |  |  |
| A_51_P316951 | 9.13E-05 | 2.4 | XM_620310    | <i>Wipf3</i>    | PREDICTED: Mus musculus WAS/WASL interacting protein family, member 3                                                                                                     |  |  |  |
| A_52_P85805  | 0.0327   | 2.9 | NM_009525    | <i>Wnt5b</i>    | wingless-related MMTV integration site 5B                                                                                                                                 |  |  |  |
| A_51_P137991 | 9.32E-05 | 3.1 | NM_009525    | <i>Wnt5b</i>    | wingless-related MMTV integration site 5B                                                                                                                                 |  |  |  |
| A_51_P184936 | 0.000616 | 4.8 | NM_021394    | <i>Zbp1</i>     | Z-DNA binding protein 1                                                                                                                                                   |  |  |  |
| A_51_P263419 | 0.00312  | 0.4 | NM_011309    | <i>Zfp30</i>    | zinc finger protein 30                                                                                                                                                    |  |  |  |
| A_51_P239236 | 3.77E-05 | 0.3 | BC022940     |                 | acetyl-Coenzyme A carboxylase beta, mRNA (cDNA clone IMAGE:4009364), partial cds.                                                                                         |  |  |  |
| A_51_P372550 | 0.000188 | 5.1 | BC023116     |                 | cell growth regulator with EF hand domain 1mRNA (cDNA clone MGC:28551 IMAGE:4206019), complete cds.                                                                       |  |  |  |
| A_51_P268529 | 0.000293 | 0.3 | AF045741     |                 | deoxyribonuclease II precursor mRNA                                                                                                                                       |  |  |  |
| A_52_P379277 | 0.00047  | 0.5 | BC005527     |                 | ectonucleotide pyrophosphatase (cDNA clone IMAGE:3495326), partial cds.                                                                                                   |  |  |  |
| A_51_P455997 | 0.000203 | 0.1 | Y13832       |                 | mRNA for GT12 protein                                                                                                                                                     |  |  |  |
| A_52_P306357 | 0.00017  | 6.8 | BC042707     |                 | prokineticin 1 with apparent retained intron (cDNA clone MGC:51604 IMAGE:4975079), complete cds.                                                                          |  |  |  |
| A_51_P420415 | 0.000379 | 0.4 | BC073863     |                 | steroid 5 alpha-reductase 1 mRNA (cDNA clone MGC:100251 IMAGE:6807475), complete cds.                                                                                     |  |  |  |
| A_52_P391130 | 0.00012  | 5.5 | BC058749     |                 | synaptotagmin 2, mRNA (cDNA clone MGC:67830 IMAGE:6390688), complete cds.                                                                                                 |  |  |  |
| A_52_P289231 | 0.00351  | 0.4 | SS7425       |                 | Mus sp. Fas antigen (lpr) mRNA, partial cds; and transposon Etn                                                                                                           |  |  |  |
| A_52_P376502 | 0.00157  | 0.2 | BC025011     |                 | calcium/calmodulin-dependent protein kinase ID, (cDNA clone IMAGE:5052777), complete cds.                                                                                 |  |  |  |
| A_52_P385824 | 0.00154  | 4.1 | BC059307     |                 | sema domain, seven thrombospondin repeats (type 1 and type 1-like), transmembrane domain (TM) and short cytoplasmic domain, mRNA (cDNA clone IMAGE:5064213), partial cds. |  |  |  |
| A_51_P452533 | 0.00134  | 2.9 | BC035277     |                 | DNA segment, Chr 1, ERATO Doi 471, expressed, mRNA (cDNA clone IMAGE:5064213), partial cds.                                                                               |  |  |  |
| A_51_P267587 | 0.00107  | 3   | BC052902     |                 | ganglioside-induced differentiation-associated-protein 10, mRNA (cDNA clone MGC:60602 IMAGE:30067675), complete cds.                                                      |  |  |  |
| A_52_P289231 | 0.00351  | 0.4 | SS7425       |                 | Mus sp. Fas antigen (lpr) mRNA, partial cds; and transposon Etn, complete sequence.                                                                                       |  |  |  |
| A_52_P376502 | 0.00157  | 0.2 | BC025011     |                 | calcium/calmodulin-dependent protein kinase ID, (cDNA clone IMAGE:5052777), complete cds.                                                                                 |  |  |  |
| A_52_P385824 | 0.00154  | 4.1 | BC059307     |                 | sema domain, seven thrombospondin repeats (type 1 and type 1-like), transmembrane domain (TM) and short cytoplasmic domain, mRNA (cDNA clone IMAGE:5064213), partial cds. |  |  |  |
| A_51_P452533 | 0.00134  | 2.9 | BC035277     |                 | DNA segment, Chr 1, ERATO Doi 471, expressed, mRNA (cDNA clone IMAGE:5064213), partial cds.                                                                               |  |  |  |
| A_51_P267587 | 0.00107  | 3   | BC052902     |                 | ganglioside-induced differentiation-associated-protein 10, mRNA (cDNA clone MGC:60602 IMAGE:30067675), complete cds.                                                      |  |  |  |

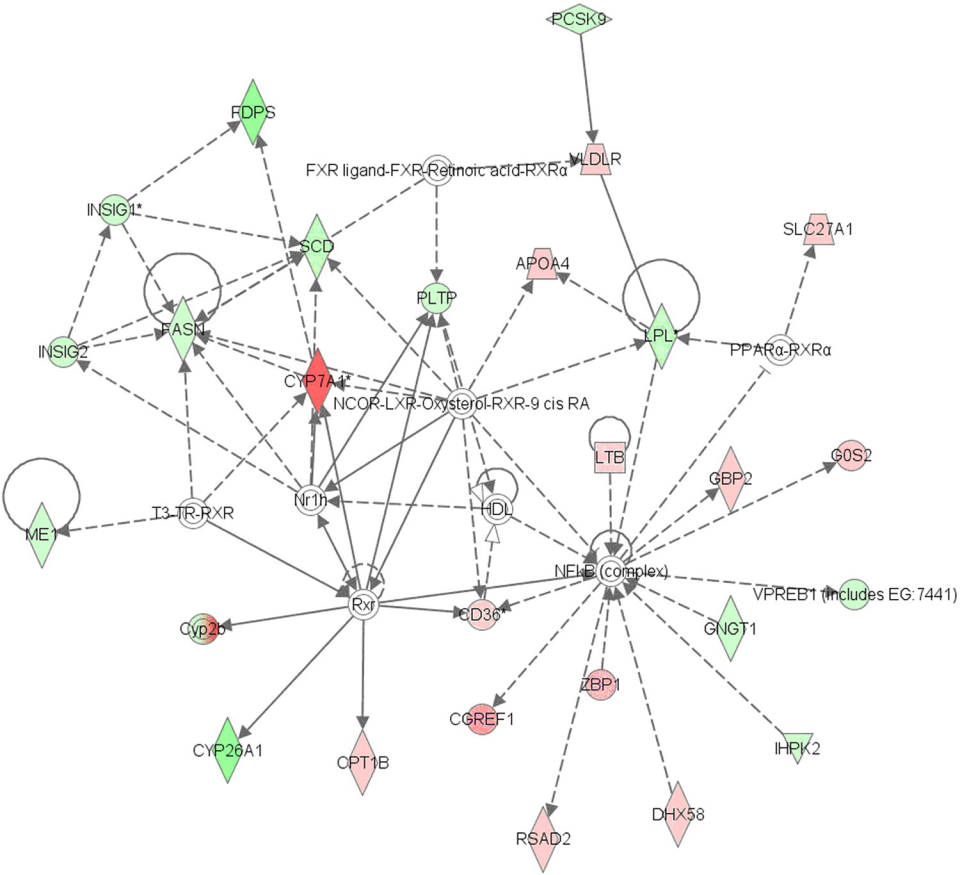



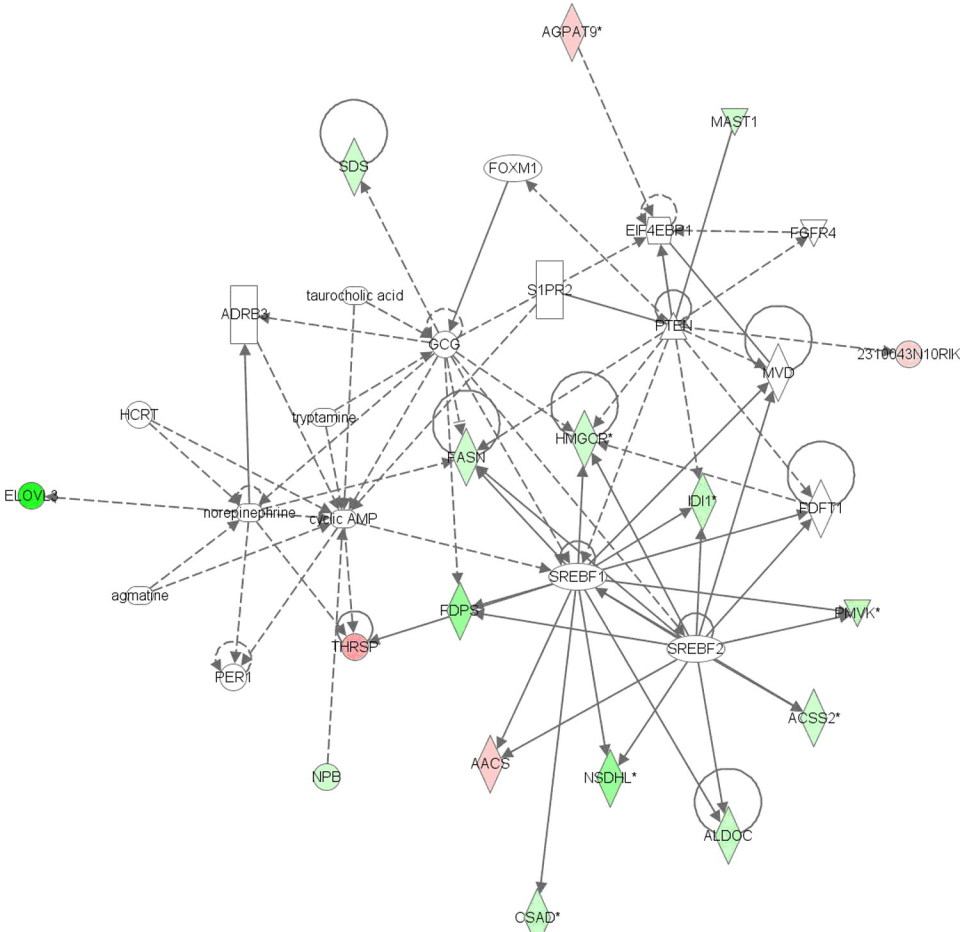

Supplement: NIHMS506284-supplement-Supplemental_Table_and_Figures.pdf [file NIHMS506284-supplement-Supplemental_Table_and_Figures.pdf]
